# Supplementary material
Source: PubMed Central journal article supplement (PMC2572793)
Supplement: blood-2008-03-142760_1.pdf [file blood-2008-03-142760_1.pdf]

## **Preparation of recombinant TMD (rTMD) proteins using both *Pichia* and mammalian protein expression systems**

The pPICZ $\alpha$ A and pCR3-EK vectors were used for expression and secretion of human rTMD proteins containing 6 $\times$ His tag and c-Myc epitope for purification and for protein detection in the *Pichia pastoris* and human embryonic kidney 293 (HEK293) mammalian protein expression systems. Briefly, DNA fragments coding for rTMD1 (residues Ala<sup>1</sup>–Ala<sup>155</sup>), rTMD2/EGF123 (residues Ala<sup>224</sup>–Glu<sup>346</sup>), and rTMD23 (residues Ala<sup>224</sup>–Ser<sup>497</sup>) were obtained by a PCR of human umbilical vein endothelial cell cDNA using specific primers. An enterokinase cutting site between the rTMD sequence and His/c-Myc tag allowed subsequent removal of the tag sequence. Yeast fermentation medium or HEK293 cell conditioned medium containing expressed rTMD proteins was applied to a nickel-chelating Sepharose column (Amersham Pharmacia Biotech., Piscataway, NJ), and rTMD-containing fractions were eluted in an imidazole gradient. The purified rTMD proteins were examined by SDS-PAGE and Western blotting, and were verified by protein identification with mass spectrometry analysis. The N-terminal amino acid sequence of rTMD proteins was also determined by Edman degradation with a model 477A sequencer (Applied Biosystems, Foster City, CA). The molecular masses of rTMD

proteins containing fusion peptides were predicted using the ExPASy website for calculating protein concentration (rTMD1: 22,902 Da, rTMD2/EGF123: 16,473 Da, and rTMD23: 32,823 Da). A non-tagged rTMD1 was prepared by incubation of 1mg rTMD1 with 5 ng enterokinase (New England Biolab, Beverly, MA) at 4°C for 16 hours. After incubation, the sample was applied to a nickel-chelating Sepharose column and the non-bound fraction containing the non-tagged rTMD1 was collected. The sample was further treated with immobilized soy bean trypsin inhibitor-Sepharose gel to adsorb the residual enterokinase. Each sample was analyzed before and after enterokinase treatment by SDS-PAGE and Western blot, and non-tagged rTMD1 having a molecular mass 2000 Da less than the original tagged rTMD1 was obtained.

### **rTMD1 ligand analysis**

Biotin-polyacrylamide (Biotin-PAA)-sugars (GlycoTech, Rockville, MA), rTMD1, rabbit anti-mouse IgG antibody (Zymed), mouse anti-6× His tag antibody (Abcam, Cambridge, UK), and streptavidin-coated donor and protein A conjugated acceptor beads (PerkinElmer, Boston, MA) were diluted with assay buffer containing 25 mM Tris (pH 7.0), 25 mM CaCl<sub>2</sub>, and 1 mg/mL BSA to appropriate concentrations. The anti-6× His tag antibody, rabbit anti-mouse IgG antibody, and acceptor beads were

incubated with assay buffer for 1 hour at 25°C before use (as the acceptor mixture). Biotin-PAA-sugars, rTMD1, and donor beads were separately added to wells of ProxiPlate-384 assay plates (PerkinElmer) and incubated at 25°C for 1 hour. An aliquot of the acceptor mixture was then added to the wells and incubated at 25°C for another 2 hours. The results were read on a PerkinElmer Envision instrument using the AlphaScreen program. All the procedures and incubations were carried out in the dark.

#### **Analysis of Lewis antigens in *E. coli* LPS O111:B4**

*E. coli* O111:B4 LPS (5 µg/well) was coated onto wells of a high-binding microtiter plate. After the nonspecific binding blocked with binding buffer containing 50 mg/mL BSA, 5 µg/mL of various kinds of antibodies (Abcam) against Lewis a (Le<sup>a</sup>), Lewis b (Le<sup>b</sup>), Lewis X (Le<sup>x</sup>), and Le<sup>y</sup> were added to wells with binding buffer containing 1 mg/mL BSA and incubated at 37°C for 2 hours prior to incubation with goat anti-mouse horseradish peroxidase-conjugated IgG or IgM at 37°C for 2 hours. The peroxidase reaction was performed using 3,3',5,5'-tetramethylbenzidine as a substrate and was stopped by 2N H<sub>2</sub>SO<sub>4</sub>. The products were detected by measuring absorbance at 450 nm.
